# Supplementary material for: Binding behavior and antioxidant study of spice extract piperine with respect to meat myoglobin
Source: Royal Society of Chemistry journal article supplement (doi:10.1039/d3fo00617d), 2023-01-01
Supplement: d3fo00617d2.pdf [file d3fo00617d2.pdf]

Electronic Supplementary Information for *Food & Function*

Supporting Information

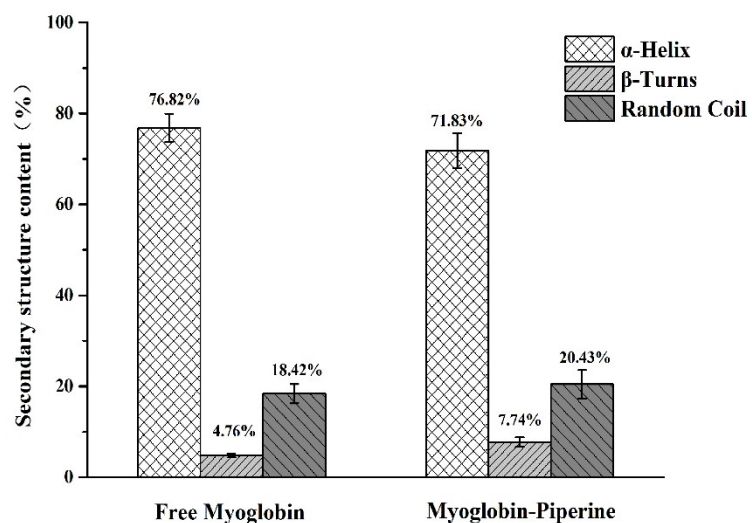

Fig.S1. Histogram of protein secondary structure content.

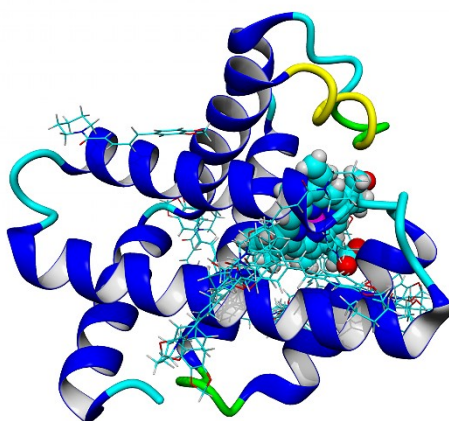

Fig. S2. The 100 docking diagrams of Mb with PIP binding modes.

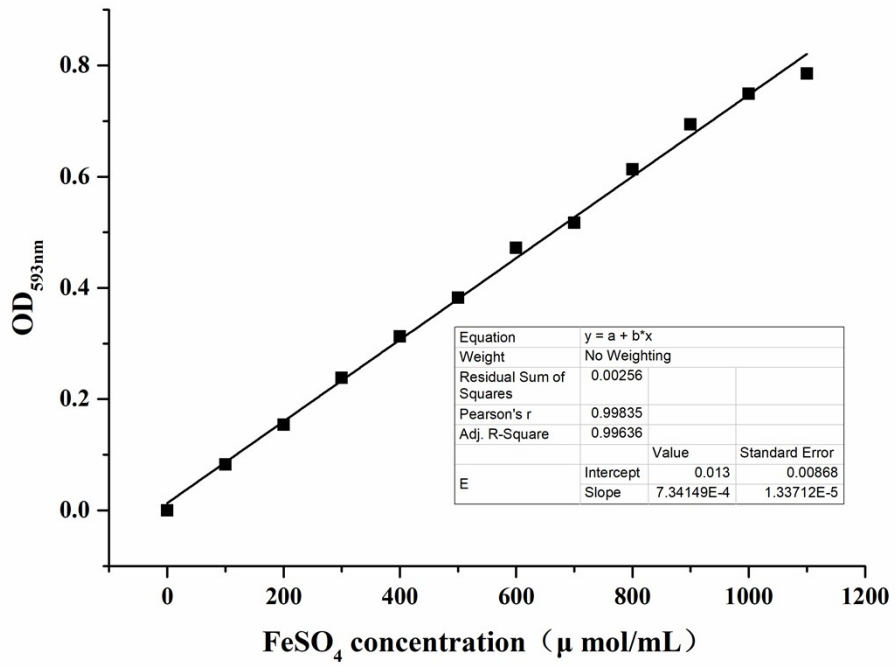

Fig. S3. The regression equation of the standard curve for the determination of  $\text{FeSO}_4$  as standard was  $y=0.0007x+0.013$  with the correlation coefficient  $R^2=0.9963$ .

Table S1. Stern–Volmer constants  $K_{sv}$ , binding constants  $K_a$ , and thermodynamic parameters for the PIP and Mb at 4, 25, and 37 °C.

| $T$ (°C) | $K_{sv} \times 10^4$<br>(L/mol) | $R^a$  | $K_a \times 10^5$<br>(L/mol) | $n$         | $R^b$  | $\Delta G^0$<br>(kJ/mol) | $\Delta H^0$<br>(kJ/mol) | $\Delta S^0$<br>(J/mol/K) |
|----------|---------------------------------|--------|------------------------------|-------------|--------|--------------------------|--------------------------|---------------------------|
| 4        | 3.632±0.273 <sup>a</sup>        | 0.9814 | 0.4005±0.294 <sup>a</sup>    | 0.758±0.081 | 0.9811 | -17.674                  | 79.350                   | 350.273                   |
| 25       | 6.004±0.213 <sup>b</sup>        | 0.9727 | 0.8612±0.199 <sup>b</sup>    | 0.796±0.026 | 0.9773 | -25.030                  |                          |                           |
| 37       | 13.382±0.197 <sup>c</sup>       | 0.9978 | 2.0844±0.136 <sup>c</sup>    | 1.021±0.048 | 0.9942 | -29.233                  |                          |                           |

$R^a$  and  $R^b$  correlation coefficient for the  $K_{sv}$  and  $K_a$  values, respectively.

In each column different superscript letters indicate significant difference ( $p < 0.05$ ).

Table S2. The data of DPPH scavenging capacity, ABTS scavenging capacity values of PIP and Mb-PIP complexes.

|                    | Sample | DPPH scavenging capacity/%   | ABTS scavenging capacity/%   |
|--------------------|--------|------------------------------|------------------------------|
| Free Piperine      | 0      | 0.000 ± 0.000 <sup>h</sup>   | 0.000 ± 0.000 <sup>h</sup>   |
|                    | 1      | 16.791 ± 1.569 <sup>gh</sup> | 17.850 ± 2.135 <sup>g</sup>  |
|                    | 2      | 18.656 ± 0.953 <sup>fg</sup> | 21.506 ± 2.884 <sup>g</sup>  |
|                    | 3      | 22.761 ± 2.508 <sup>ef</sup> | 30.074 ± 3.946 <sup>f</sup>  |
|                    | 4      | 24.761 ± 1.518 <sup>f</sup>  | 33.755 ± 4.311 <sup>ef</sup> |
|                    | 5      | 28.358 ± 3.298 <sup>e</sup>  | 56.355 ± 4.849 <sup>cd</sup> |
|                    | 6      | 29.477 ± 1.313 <sup>e</sup>  | 61.044 ± 4.384 <sup>e</sup>  |
|                    | 7      | 29.850 ± 4.617 <sup>e</sup>  | 65.683 ± 1.187 <sup>e</sup>  |
| Myoglobin-Piperine | 0      | 3.665 ± 0.008 <sup>h</sup>   | 0.865 ± 0.011 <sup>h</sup>   |
|                    | 1      | 33.288 ± 3.196 <sup>c</sup>  | 23.834 ± 1.210 <sup>fg</sup> |
|                    | 2      | 36.538 ± 5.333 <sup>de</sup> | 33.232 ± 3.900 <sup>f</sup>  |
|                    | 3      | 39.510 ± 2.852 <sup>d</sup>  | 40.322 ± 2.701 <sup>e</sup>  |
|                    | 4      | 47.924 ± 3.675 <sup>c</sup>  | 62.074 ± 3.137 <sup>e</sup>  |
|                    | 5      | 48.141 ± 1.288 <sup>bc</sup> | 68.081 ± 1.924 <sup>e</sup>  |
|                    | 6      | 52.046 ± 0.800 <sup>b</sup>  | 74.329 ± 2.246 <sup>b</sup>  |
|                    | 7      | 63.811 ± 4.534 <sup>a</sup>  | 80.516 ± 4.868 <sup>a</sup>  |

\* Values mean SD (n = 3). Different letters (a–h) above each column indicate significant differences ( $p < 0.05$ ).
